# Supplementary material for: Stress responses to conspecific visual cues of predation risk in zebrafish
Source: PubMed Central journal article supplement (PMC5588784; doi:10.7717/peerj.3739), 2017-09-04
Supplement: peerj-05-3739-s001.pdf [file peerj-05-3739-s001.pdf]

**(Data and statistics)**

**Title: Stress responses to conspecific visual cues of predation risk in zebrafish**

Authors: Thiago Acosta Oliveira; Renan Idalencio, Fabiana Kalichack, João Gabriel S. da Rosa, Gessi Koakoski, Murilo S. de Abreu, Ana Cristina V. Giacomini, Darlan Gusso, Denis B. Rosemberg, Rodrigo E. Barreto, Leonardo José Gil Barcellos

Whole-body cortisol raw data expressed as ng/g of wet tissue

| Predator |          | Non-predator |          | Non stimulus fish |          |
|----------|----------|--------------|----------|-------------------|----------|
| Sender   | Receiver | Sender       | Receiver | Sender            | Receiver |
| 47.5     | 20.0     | 10.5         | 5.5      | 5.0               | 9.0      |
| 15.0     | 14.5     | 11.5         | 9.5      | 8.5               | 18.0     |
| 23.5     | 14.0     | 24.0         | 8.5      | 9.0               | 14.5     |
| 17.0     | 22.5     | 28.0         | 9.5      | 9.0               | 9.0      |
| 19.5     | 17.0     | 22.5         | 9.5      | 10.0              | 12.0     |
| 17.0     | 16.5     | 14.5         | 6.0      | 6.0               | 2.5      |
| 17.5     | 19.0     | 16.5         | 7.0      | 4.5               | 13.0     |
|          | 15.0     |              | 7.5      | 8.5               |          |

Whole-body cortisol statistics

| Two-way ANOVA       | Ordinary             |          |                 |                   |            |  |
|---------------------|----------------------|----------|-----------------|-------------------|------------|--|
| Alpha               | 0,05                 |          |                 |                   |            |  |
| Source of Variation | % of total variation | P value  | P value summary | Significant?      |            |  |
| Interaction         | 13,67                | 0,0077   | **              | Yes               |            |  |
| Row Factor          | 6,499                | 0,0274   | *               | Yes               |            |  |
| Column Factor       | 31,50                | < 0,0001 | ****            | Yes               |            |  |
| ANOVA table         | SS                   | DF       | MS              | F (DFn, DFd)      | P value    |  |
| Interaction         | 369,2                | 2        | 184,6           | F (2, 39) = 5,527 | P = 0,0077 |  |
| Row Factor          | 175,5                | 1        | 175,5           | F (1, 39) = 5,254 | P = 0,0274 |  |
| Column Factor       | 850,4                | 2        | 425,2           | F (2, 39) = 12,73 | P < 0,0001 |  |
| Residual            | 1303                 | 39       | 33,40           |                   |            |  |

Number of families 1  
 Number of comparisons per family 15  
 Alpha 0,05

| Tukey's multiple comparisons test                       | Mean Diff, | 95% CI of diff,  | Significant? | Summary |
|---------------------------------------------------------|------------|------------------|--------------|---------|
| Sender:Predator vs. Sender:Non-predator                 | 4,214      | -5,041 to 13,47  | No           | ns      |
| Sender:Predator vs. Sender:Non-stimulus fish            | 14,87      | 5,905 to 23,83   | Yes          | ***     |
| Sender:Predator vs. Receiver:Predator                   | 5,116      | -3,845 to 14,08  | No           | ns      |
| Sender:Predator vs. Receiver:Non-predator               | 14,55      | 5,593 to 23,51   | Yes          | ***     |
| Sender:Predator vs. Receiver:Non-stimulus fish          | 11,29      | 2,031 to 20,54   | Yes          | **      |
| Sender:Non-predator vs. Sender:Non-stimulus fish        | 10,65      | 1,691 to 19,61   | Yes          | *       |
| Sender:Non-predator vs. Receiver:Predator               | 0,9018     | -8,059 to 9,863  | No           | ns      |
| Sender:Non-predator vs. Receiver:Non-predator           | 10,34      | 1,378 to 19,30   | Yes          | *       |
| Sender:Non-predator vs. Receiver:Non-stimulus fish      | 7,071      | -2,183 to 16,33  | No           | ns      |
| Sender:Non-stimulus fish vs. Receiver:Predator          | -9,750     | -18,41 to -1,093 | Yes          | *       |
| Sender:Non-stimulus fish vs. Receiver:Non-predator      | -0,3125    | -8,970 to 8,345  | No           | ns      |
| Sender:Non-stimulus fish vs. Receiver:Non-stimulus fish | -3,580     | -12,54 to 5,381  | No           | ns      |
| Receiver:Predator vs. Receiver:Non-predator             | 9,438      | 0,7803 to 18,09  | Yes          | *       |
| Receiver:Predator vs. Receiver:Non-stimulus fish        | 6,170      | -2,791 to 15,13  | No           | ns      |
| Receiver:Non-predator vs. Receiver:Non-stimulus fish    | -3,268     | -12,23 to 5,693  | No           | ns      |

Sender fish

|                                        |             |
|----------------------------------------|-------------|
| Table Analyzed                         | senders     |
| Kruskal-Wallis test                    |             |
| P value                                | 0,0006      |
| Exact or approximate P value?          | Approximate |
| P value summary                        | ***         |
| Do the medians vary signif. (P < 0.05) | Yes         |
| Number of groups                       | 3           |
| Kruskal-Wallis statistic               | 14,92       |
| Data summary                           |             |
| Number of treatments (columns)         | 3           |
| Number of values (total)               | 22          |

Post-hoc

|                                          |                 |              |                 |    |    |
|------------------------------------------|-----------------|--------------|-----------------|----|----|
| Number of families                       | 1               |              |                 |    |    |
| Number of comparisons per family         | 3               |              |                 |    |    |
| Alpha                                    | 0,05            |              |                 |    |    |
| Dunn's multiple comparisons test         | Mean rank diff, | Significant? | Summary         |    |    |
| predator SF vs. non-predator SF          | 1,857           | No           | ns              |    |    |
| predator SF vs. non-stimulus fish SF     | 11,93           | Yes          | **              |    |    |
| non-predator SF vs. non-stimulus fish SF | 10,07           | Yes          | **              |    |    |
| Test details                             | Mean rank 1     | Mean rank 2  | Mean rank diff, | n1 | n2 |
| predator SF vs. non-predator SF          | 16,43           | 14,57        | 1,857           | 7  | 7  |
| predator SF vs. non-stimulus fish SF     | 16,43           | 4,500        | 11,93           | 7  | 8  |
| non-predator SF vs. non-stimulus fish SF | 14,57           | 4,500        | 10,07           | 7  | 8  |

Receiver fish

|                                            |             |
|--------------------------------------------|-------------|
| Table Analyzed                             | receivers   |
| Kruskal-Wallis test                        |             |
| P value                                    | 0,0010      |
| Exact or approximate P value?              | Approximate |
| P value summary                            | **          |
| Do the medians vary signif. ( $P < 0.05$ ) | Yes         |
| Number of groups                           | 3           |
| Kruskal-Wallis statistic                   | 13,74       |
| Data summary                               |             |
| Number of treatments (columns)             | 3           |
| Number of values (total)                   | 23          |

Post-hoc

|                                          |                 |              |                 |    |    |
|------------------------------------------|-----------------|--------------|-----------------|----|----|
| Number of families                       | 1               |              |                 |    |    |
| Number of comparisons per family         | 3               |              |                 |    |    |
| Alpha                                    | 0,05            |              |                 |    |    |
| Dunn's multiple comparisons test         | Mean rank diff, | Significant? | Summary         |    |    |
| predator RF vs. non-predator RF          | 12,44           | Yes          | ***             |    |    |
| predator RF vs. non-stimulus fish RF     | 7,759           | No           | ns              |    |    |
| non-predator RF vs. non-stimulus fish RF | -4,679          | No           | ns              |    |    |
| Test details                             | Mean rank 1     | Mean rank 2  | Mean rank diff, | n1 | n2 |
| predator RF vs. non-predator RF          | 18,69           | 6,250        | 12,44           | 8  | 8  |
| predator RF vs. non-stimulus fish RF     | 18,69           | 10,93        | 7,759           | 8  | 7  |
| non-predator RF vs. non-stimulus fish RF | 6,250           | 10,93        | -4,679          | 8  | 7  |
|                                          |                 |              |                 |    |    |

Behavior – expressed as % of time spent at the tank bottom

| Predator |           | Non-predator |          | Non stimulus fish |           |
|----------|-----------|--------------|----------|-------------------|-----------|
| Sender   | Receiver  | Sender       | Receiver | Sender            | Receiver  |
| 92,77778 | 71,38889  | 63,88889     | 63,61111 | 8,611111          | 8,888889  |
| 93,33333 | 100,00000 | 36,11111     | 34,72222 | 12,222220         | 16,111110 |
| 96,38889 | 100,00000 | 58,88889     | 50,00000 | 16,388890         | 11,111110 |
| 86,38889 | 93,05556  | 77,77778     | 43,05556 | 23,333330         | 23,611110 |

Statistics

Two-way ANOVA

Ordinary

Alpha

0,05

Source of Variation

% of total variation

P value

P value summary

Significant?

Interaction

0,5870

0,5474

ns

No

Row Factor

0,4104

0,3629

ns

No

Column Factor

90,52

< 0,0001

\*\*\*\*

Yes

ANOVA table

SS

DF

MS

F (DFn, DFd)

P value

Interaction

152,3

2

76,16

F (2, 18) = 0,6231

P = 0,5474

Row Factor

106,5

1

106,5

F (1, 18) = 0,8713

P = 0,3629

Column Factor

23490

2

11745

F (2, 18) = 96,09

P < 0,0001

Residual

2200

18

122,2

Post hoc

Compare cell means regardless of rows and columns

Number of families

1

Number of comparisons per family

15

Alpha

0,05

| Tukey's multiple comparisons test                       | Mean Diff, | 95% CI of diff,  | Significant? | Summary |
|---------------------------------------------------------|------------|------------------|--------------|---------|
| Sender:predator vs. Sender:non-predator                 | 33,06      | 8,211 to 57,90   | Yes          | **      |
| Sender:predator vs. Sender:non-stimulus fish            | 77,08      | 52,24 to 101,9   | Yes          | ****    |
| Sender:predator vs. Receiver:predator                   | 1,111      | -23,73 to 25,96  | No           | ns      |
| Sender:predator vs. Receiver:non-predator               | 44,38      | 19,53 to 69,22   | Yes          | ***     |
| Sender:predator vs. Receiver:non-stimulus fish          | 77,29      | 52,45 to 102,1   | Yes          | ****    |
| Sender:non-predator vs. Sender:non-stimulus fish        | 44,03      | 19,18 to 68,87   | Yes          | ***     |
| Sender:non-predator vs. Receiver:predator               | -31,94     | -56,79 to -7,100 | Yes          | **      |
| Sender:non-predator vs. Receiver:non-predator           | 11,32      | -13,52 to 36,16  | No           | ns      |
| Sender:non-predator vs. Receiver:non-stimulus fish      | 44,24      | 19,39 to 69,08   | Yes          | ***     |
| Sender:non-stimulus fish vs. Receiver:predator          | -75,97     | -100,8 to -51,13 | Yes          | ****    |
| Sender:non-stimulus fish vs. Receiver:non-predator      | -32,71     | -57,55 to -7,864 | Yes          | **      |
| Sender:non-stimulus fish vs. Receiver:non-stimulus fish | 0,2083     | -24,64 to 25,05  | No           | ns      |
| Receiver:predator vs. Receiver:non-predator             | 43,26      | 18,42 to 68,11   | Yes          | ***     |
| Receiver:predator vs. Receiver:non-stimulus fish        | 76,18      | 51,34 to 101,0   | Yes          | ****    |
| Receiver:non-predator vs. Receiver:non-stimulus fish    | 32,92      | 8,073 to 57,76   | Yes          | **      |

Sender fish

| Table Analyzed                                                    | senders beahv |  |  |  |
|-------------------------------------------------------------------|---------------|--|--|--|
| ANOVA summary                                                     |               |  |  |  |
| F                                                                 | 50,17         |  |  |  |
| P value                                                           | < 0,0001      |  |  |  |
| P value summary                                                   | ****          |  |  |  |
| Are differences among means statistically significant? (P < 0.05) | Yes           |  |  |  |
| R square                                                          | 0,9177        |  |  |  |
| Brown-Forsythe test                                               |               |  |  |  |
| F (DFn, DFd)                                                      | 1,841 (2, 9)  |  |  |  |
| P value                                                           | 0,2136        |  |  |  |
| P value summary                                                   | ns            |  |  |  |

|                                                         |        |    |       |                  |            |
|---------------------------------------------------------|--------|----|-------|------------------|------------|
| Significantly different standard deviations? (P < 0.05) | No     |    |       |                  |            |
| Bartlett's test                                         |        |    |       |                  |            |
| Bartlett's statistic (corrected)                        | 5,438  |    |       |                  |            |
| P value                                                 | 0,0659 |    |       |                  |            |
| P value summary                                         | ns     |    |       |                  |            |
| Significantly different standard deviations? (P < 0.05) | No     |    |       |                  |            |
| ANOVA table                                             | SS     | DF | MS    | F (DFn, DFd)     | P value    |
| Treatment (between columns)                             | 11964  | 2  | 5982  | F (2, 9) = 50,17 | P < 0,0001 |
| Residual (within columns)                               | 1073   | 9  | 119,2 |                  |            |
| Total                                                   | 13037  | 11 |       |                  |            |
| Data summary                                            |        |    |       |                  |            |
| Number of treatments (columns)                          | 3      |    |       |                  |            |
| Number of values (total)                                | 12     |    |       |                  |            |

Post hoc

|                                          |            |                 |              |             |    |    |       |    |
|------------------------------------------|------------|-----------------|--------------|-------------|----|----|-------|----|
| Number of families                       | 1          |                 |              |             |    |    |       |    |
| Number of comparisons per family         | 3          |                 |              |             |    |    |       |    |
| Alpha                                    | 0,05       |                 |              |             |    |    |       |    |
| Tukey's multiple comparisons test        | Mean Diff, | 95% CI of diff, | Significant? | Summary     |    |    |       |    |
| predator SF vs. non-predator SF          | 33,06      | 11,50 to 54,61  | Yes          | **          |    |    |       |    |
| predator SF vs. non-stimulus fish SF     | 77,08      | 55,53 to 98,64  | Yes          | ****        |    |    |       |    |
| non-predator SF vs. non-stimulus fish SF | 44,03      | 22,47 to 65,59  | Yes          | ***         |    |    |       |    |
| Test details                             | Mean 1     | Mean 2          | Mean Diff,   | SE of diff, | n1 | n2 | q     | DF |
| predator SF vs. non-                     | 92,22      | 59,17           | 33,06        | 7,721       | 4  | 4  | 6,055 | 9  |



|                                          |       |       |       |       |   |   |       |   |
|------------------------------------------|-------|-------|-------|-------|---|---|-------|---|
| predator SF                              |       |       |       |       |   |   |       |   |
| predator SF vs. non-stimulus fish SF     | 92,22 | 15,14 | 77,08 | 7,721 | 4 | 4 | 14,12 | 9 |
| non-predator SF vs. non-stimulus fish SF | 59,17 | 15,14 | 44,03 | 7,721 | 4 | 4 | 8,064 | 9 |

Receiver fish

|                                                                   |                 |    |       |                  |            |
|-------------------------------------------------------------------|-----------------|----|-------|------------------|------------|
| Table Analyzed                                                    | receivers behav |    |       |                  |            |
| ANOVA summary                                                     |                 |    |       |                  |            |
| F                                                                 | 46,63           |    |       |                  |            |
| P value                                                           | < 0,0001        |    |       |                  |            |
| P value summary                                                   | ****            |    |       |                  |            |
| Are differences among means statistically significant? (P < 0.05) | Yes             |    |       |                  |            |
| R square                                                          | 0,9120          |    |       |                  |            |
| Brown-Forsythe test                                               |                 |    |       |                  |            |
| F (DFn, DFd)                                                      | 0,3653 (2, 9)   |    |       |                  |            |
| P value                                                           | 0,7039          |    |       |                  |            |
| P value summary                                                   | ns              |    |       |                  |            |
| Significantly different standard deviations? (P < 0.05)           | No              |    |       |                  |            |
| Bartlett's test                                                   |                 |    |       |                  |            |
| Bartlett's statistic (corrected)                                  | 1,354           |    |       |                  |            |
| P value                                                           | 0,5080          |    |       |                  |            |
| P value summary                                                   | ns              |    |       |                  |            |
| Significantly different standard deviations? (P < 0.05)           | No              |    |       |                  |            |
| ANOVA table                                                       | SS              | DF | MS    | F (DFn, DFd)     | P value    |
| Treatment (between columns)                                       | 11678           | 2  | 5839  | F (2, 9) = 46,63 | P < 0,0001 |
| Residual (within columns)                                         | 1127            | 9  | 125,2 |                  |            |
| Total                                                             | 12805           | 11 |       |                  |            |

|                                |    |  |  |  |  |
|--------------------------------|----|--|--|--|--|
| Data summary                   |    |  |  |  |  |
| Number of treatments (columns) | 3  |  |  |  |  |
| Number of values (total)       | 12 |  |  |  |  |

Post hoc

|                                          |            |                 |              |             |    |    |       |    |
|------------------------------------------|------------|-----------------|--------------|-------------|----|----|-------|----|
| Number of families                       | 1          |                 |              |             |    |    |       |    |
| Number of comparisons per family         | 3          |                 |              |             |    |    |       |    |
| Alpha                                    | 0,05       |                 |              |             |    |    |       |    |
| Tukey's multiple comparisons test        | Mean Diff, | 95% CI of diff, | Significant? | Summary     |    |    |       |    |
| predator RF vs. non-predator RF          | 43,26      | 21,17 to 65,36  | Yes          | **          |    |    |       |    |
| predator RF vs. non-stimulus fish RF     | 76,18      | 54,09 to 98,27  | Yes          | ****        |    |    |       |    |
| non-predator RF vs. non-stimulus fish RF | 32,92      | 10,82 to 55,01  | Yes          | **          |    |    |       |    |
| Test details                             | Mean 1     | Mean 2          | Mean Diff,   | SE of diff, | n1 | n2 | q     | DF |
| predator RF vs. non-predator RF          | 91,11      | 47,85           | 43,26        | 7,913       | 4  | 4  | 7,733 | 9  |
| predator RF vs. non-stimulus fish RF     | 91,11      | 14,93           | 76,18        | 7,913       | 4  | 4  | 13,62 | 9  |
| non-predator RF vs. non-stimulus fish RF | 47,85      | 14,93           | 32,92        | 7,913       | 4  | 4  | 5,883 | 9  |
